# Fast gene set enrichment analysis

Gennady Korotkevich<sup>1,\*</sup>, Vladimir Sukhov<sup>1,2,\*</sup>, Nikolay Budin<sup>1</sup>, Boris Shpak<sup>1</sup>,  
Maxim N. Artyomov<sup>3</sup>, and Alexey Sergushichev<sup>1,\*\*</sup>

<sup>1</sup>Computer Technologies Laboratory, ITMO University, Saint Petersburg,  
197101, Russia

<sup>2</sup>JetBrains Research, Saint Petersburg, Russia

<sup>3</sup>Washington University in St. Louis, St. Louis, MO, USA

\* contributed equally

\*\* corresponding author, e-mail: [alserg@itmo.ru](mailto:alserg@itmo.ru)

## Abstract

Gene set enrichment analysis (GSEA) is an ubiquitously used tool for evaluating pathway enrichment in transcriptional data. Typical experimental design consists in comparing two conditions with several replicates using a differential gene expression test followed by preranked GSEA performed against a collection of hundreds and thousands of pathways. However, the reference implementation of this method cannot accurately estimate small P-values, which significantly limits its sensitivity due to multiple hypotheses correction procedure.

Here we present FGSEA (Fast Gene Set Enrichment Analysis) method that is able to estimate arbitrarily low GSEA P-values with a high accuracy in a matter of minutes

20 or even seconds. To confirm the accuracy of the method, we also developed an exact  
21 algorithm for GSEA P-values calculation for integer gene-level statistics. Using the  
22 exact algorithm as a reference we show that FGSEA is able to routinely estimate P-  
23 values up to  $10^{-100}$  with a small and predictable estimation error. We systematically  
24 evaluate FGSEA on a collection of 605 datasets and show that FGSEA recovers much  
25 more statistically significant pathways compared to other implementations.

26 FGSEA is open source and available as an R package in Bioconductor ([http://](http://bioconductor.org/packages/fgsea/)  
27 [bioconductor.org/packages/fgsea/](http://bioconductor.org/packages/fgsea/)) and on GitHub (<https://github.com/ctlab/fgsea/>).

## 28 **1 Main**

29 Preranked gene set enrichment analysis (GSEA) [1] is a widely used method for analyzing  
30 gene expression data, particularly for datasets with small number of replicates. It allows to  
31 select from an *a priori* defined collection of pathways those which have non-random behavior  
32 in a considered experiment (Fig 1a). The method uses an enrichment score (ES) statistic  
33 which is calculated based on a vector of gene-level signed statistics, such as *t*-statistic from  
34 a differential expression test. As the analytical form of the null distribution for the ES  
35 statistic is not known, empirical null distribution has to be calculated. That can be done  
36 in a straightforward manner by sampling random gene sets as was done in the reference  
37 implementation [1] and reimplementations [2, 3]. In this case for each of the input pathways  
38 a number of random gene sets of the same size are generated, and for each of them an ES  
39 value is calculated. Then a P-value is estimated as the number of random gene sets with  
40 the same or more extreme ES value divided by the total number of generated gene sets (a  
41 formal definition is available in the section 2.1). Finally, a multiple hypothesis correction  
42 procedure is applied to get adjusted P-values.

43 However, a large number of generated random gene sets can be required to reach a  
44 given false discovery rate (FDR) level on some datasets. As an example, we calculated

45 GSEA P-values for Gene Ontology Biological Pathways collection (C5\_BP subset of MSigDB  
46 collection [1]) on four datasets from Gene Expression Omnibus (GEO) varying the sampling  
47 depth, and calculated the number of pathways reaching FDR level of 0.01 after Benjamini-  
48 Hochberg (BH) correction. Due to the properties of BH procedure, the dependence of the  
49 number of significant pathways in these experiments has a phase transition behavior (Fig 1b):  
50 for each of the datasets there exist a certain critical sampling depth after which the number  
51 of significant pathways becomes non-zero and stays on the same level. This critical sampling  
52 depth is different for different datasets, but ultimately can reach the order of  $M/\alpha$ , where  $\alpha$   
53 is the selected FDR threshold and  $M$  is the number of considered pathways.

54 To systematically assess the distribution of GSEA critical sampling depth on real datasets  
55 we prepared a collection of 605 microarray datasets from Gene Expression Omnibus (GEO)  
56 containing only two biological conditions. For each of these datasets we ran the differential  
57 expression analysis and used the results as gene-level statistics. We discovered that more than  
58 half of the datasets has the critical sampling depth of at least  $10^4$  and a noticeable portion  
59 (10—20% depending on the collection) has the critical sampling depth of at least  $10^5$  (Fig 1c).  
60 When a large pathway collection is considered (entire MSigDB collection) individual datasets  
61 has values of critical sampling depths reaching  $5 \cdot 10^6$ . However, even running the reference  
62 implementation with the sampling depth of  $n = 10^4$  routinely is inconvenient and running  
63 it with  $n = 10^5$  can be impossible due to the time and memory consumption (Fig 1d): time  
64 and memory requirements grow linearly with the number of samples and the collection size.

65 To improve applicability of preranked GSEA analysis we present a fast gene set enrich-  
66 ment analysis (FGSEA) method for accurate and efficient estimation of GSEA P-values for  
67 a collection of pathways. The method consist of two main procedures: *FGSEA-simple* and  
68 *FGSEA-multilevel*. FGSEA-simple procedure allows to efficiently estimate P-values with a  
69 limited accuracy but simultaneously for the whole *collection* of gene sets, while FGSEA-  
70 multilevel procedure allows to accurately estimate arbitrarily low P-values but for *individual*

71 gene sets.

72 FGSEA-simple procedure is based on an idea that generated random gene set samples  
73 can be shared between different input pathways. Indeed, consider  $M$  gene sets of the sizes  
74  $K_1 \leq K_2 \leq \dots \leq K_M = K$  and a collection of  $n$  independent samples  $g_i$  of size  $K$  (Fig 2a).  
75 As in the naive approach, due to  $g_i$  being independent samples of the size  $K$  the P-value  
76 for the pathway  $M$  can be estimated as a proportion of samples  $g_i$  having the same or more  
77 extreme ES value as the pathway  $M$ . However, for any other pathway  $j$  we can construct  
78 a set of  $n$  independent samples of size  $K_j$  by considering the prefixes  $g_{i,1..K_j}$ . Again, given  
79 a set of independent samples, the P-value can be estimated as a proportion of the samples  
80 having the same or more extreme ES value.

81 The next important idea is that given a gene set sample  $g_i$  of the size  $K$  the ES values for  
82 *all* the prefixes  $g_{i,1..j}$  can be calculated in an efficient manner using a square root heuristic  
83 (Fig 2b). Briefly, a variant of an enrichment curve is considered: the genes are enumerated  
84 starting from the most up-regulated to the most down-regulated, with the curve going to  
85 the right if the gene is not present in the pathway, and the curve goes upward if the gene is  
86 present in the pathway. It can be shown that the enrichment score can be easily calculated if  
87 curve point most distant from the diagonal is known. Let us split  $K$  genes from the gene set  
88 into  $b \approx \sqrt{K}$  consecutive blocks of size  $\sqrt{K}$  and consider what happens with the curve when  
89 we change the prefix from  $g_{i,1..j-1}$  to  $g_{i,1..j}$  by adding gene  $g_{i,j}$ . The curve in the blocks to the  
90 left of  $g_{i,j}$  are not changed at all, while the blocks to the right of  $g_{i,j}$  are uniformly shifted.  
91 This observation allows us to consider the prefixes in an increasing order and update the  
92 position of the most distant point in  $O(\sqrt{K})$  time. Briefly, for the each block which is either  
93 not changed or shifted the update procedure takes  $O(1)$  time, while for the changed block the  
94 update procedure is proportional to its size and takes  $O(\sqrt{K})$  time. Finally, aggregating the  
95 blocks takes additional  $O(\sqrt{K})$  time. Overall this results in time complexity of  $O(K\sqrt{K})$   
96 to calculate ES values for all the prefixes. In total, the time complexity of the calculating

97 P-values for the set of  $M$  pathways is  $n(K\sqrt{K} + M)$ , which gives around  $O(K\frac{\log K}{\sqrt{K}})$  speed  
98 up compared to a naive approach. The full description of the algorithm is given in the  
99 section 2.3.

100 As an example we ran FGSEA-simple and the reference implementations on the same  
101 example dataset of genes differentially regulated on Th1 activation [4] against a set of 700 Re-  
102 actome [5] pathways (see section 2.2) and compared the resulting nominal P-values (Fig 2c).  
103 Both methods were ran with  $n = 10000$  and the results are indistinguishable from each  
104 other up to the random noise inherent to both methods. However, on this example the  
105 reference implementation took about 420 seconds, while FGSEA-simple finished in about 4  
106 seconds. The two order of magnitude speed-up is consistent with the theoretical one due to  
107 the algorithm time complexity. Given a highly parallel implementation of FGSEA-simple,  
108 its performance allows to routinely achieve sampling depth of  $10^5$  and accurately estimate  
109 P-values as low as  $10^{-5}$ .

110 However, accurately estimating P-values lower than  $10^{-5}$  with FGSEA-simple can be  
111 impractical or even infeasible. To estimate such low P-values we developed *FGSEA-multilevel*  
112 method, which is based on an adaptive multi-level split Monte Carlo scheme [6]. The method  
113 takes as an input an ES value  $\gamma > 0$  and a gene set size  $K$ , and calculates the probability  
114  $P_K(\text{ES} \geq \gamma)$  of a random gene set of size  $K$  to have an enrichment score no less than  $\gamma$ . The  
115 method sequentially finds ES levels  $l_i$  for which the probability  $P_K(\text{ES} \geq l_i)$  is approximately  
116 equal to  $2^{-i}$  (see Fig 3a for a toy example). The method stops when  $l_i$  becomes greater than  
117  $\gamma$  and the P-value can be crudely approximated as  $2^{-i}$ .

118 The intermediate  $l_i$  thresholds are calculated as follows. First, a set of  $Z$  (an odd number,  
119 parameter of the method) random gene sets of size  $K$  are generated uniformly and ES values  
120 for them are calculated. The median value of the ES values is calculated and assigned to  $l_1$ .  
121 By construction, the probability  $P_K(\gamma \geq l_1)$  of a random gene set to have an ES value no less  
122 than  $l_1$  can be approximated as  $\frac{1}{2}$ . Next  $\frac{Z-1}{2}$  generated gene sets with the ES values less than

123  $l_1$  are discarded, while  $\frac{Z-1}{2}$  gene sets with the ES values greater than  $l_1$  are duplicated. This  
124 results in a sample of  $Z$  gene sets with the ES values no less than  $l_1$ , but the distribution is  
125 non-uniform. However, it can be made into a uniform sample with a Metropolis algorithm.  
126 On each Metropolis algorithm step each gene set sample is tried to be modified by swapping  
127 a random gene from the set with a gene outside of the set. The change is accepted if an  
128 enrichment score of the new set is no less than current threshold  $l_1$ , otherwise the change is  
129 rejected. Metropolis algorithm guarantees, that after enough steps the sample becomes close  
130 to uniformly distributed. Thus, a median of the enrichment scores ( $l_2$ ) would correspond to  
131 probability of  $\frac{1}{2}$  for a gene set to have an enrichment score no less than  $l_2$  given it has an  
132 enrichment score no less than  $l_1$ :

$$P_K(\text{ES} \geq l_2 \mid \text{ES} \geq l_1) \approx \frac{1}{2}.$$

133 Which means

$$P_K(\text{ES} \geq l_2) \approx 2^{-2}.$$

134 The same procedure is applied to calculate the next  $l_i$  values.

135 The iterations stop when  $l_i$  becomes greater than  $\gamma$ . On this iteration the probability of  
136 a random gene set to have a ES value no less than  $\gamma$  can be approximated as:

$$\frac{1}{2^{i-1}} \cdot \frac{\#\{\text{samples with ES} \geq \gamma\}}{Z}.$$

137 When estimating small P-values it becomes practical to carry out the estimation in log-  
138 scale. In particular, the values become practically unbiased both in median and mean sense  
139 and it becomes simple to estimate the approximation error and confidence intervals (see  
140 section 2.5.4).

141 The full formal description of the algorithm is available in the section 2.5.

142 For the example dataset we show that P-values are as low as  $10^{-26}$  for some of the path-  
143 ways and the results are consistent with FGSEA-simple P-values ran on  $10^8$  permutations  
144 (Fig 3b). Note, that FGSEA-multilevel calculation with sample size of  $Z=101$  took only  
145 10 seconds working on a single thread while  $10^8$  permutations on FGSEA-simple took 40  
146 minutes working in 32 threads.

147 To further prove the approximation quality of FGSEA-multilevel algorithm we developed  
148 an exact method for calculating GSEA P-values, but limited to integer weights. The method  
149 is based on dynamic programming, the full description is given in section 2.4. The complexity  
150 of the algorithm is  $O(NKT^2)$ , where  $N$  is the number of genes,  $K$  is the size of gene sets  
151 and  $T$  is the sum of the top  $K$  absolute values of gene-level statistics. With a number of  
152 optimizations this method allows to calculate P-values for rounded weights in the example  
153 dataset in a couple of hours.

154 When run on the same integer weights FGSEA-multilevel and the exact method give  
155 highly concordant results (Fig 3c). Additionally, using the exact P-values, real approximation  
156 errors can be compared with the estimated ones. We show, that the FGSEA-multilevel error  
157 estimation are highly concordant with the real errors (Fig 3d) for a wide range of P-values  
158 (from  $10^{-4}$  to  $10^{-100}$ ), gene set sizes (from 15 to 250) and sample sizes (from 101 to 1001).

159 In practice FGSEA-multilevel method is combined with FGSEA-simple. First, for all the  
160 input pathways FGSEA-simple method can be run with a limited sample size. Next, for the  
161 pathways that have high relative error after FGSEA-simple (i.e. pathways with low p-values)  
162 FGSEA-multilevel method is executed. As many of the pathways in an input collection  
163 usually are not enriched, they have a relatively high P-value and will be batch-processed  
164 with a highly efficient FGSEA-simple algorithm with deterministic time boundaries. The  
165 more interesting pathways with lower P-values will then be processed with FGSEA-multilevel  
166 algorithm individually and the amount of processing time will depend on their P-values.

167 As FGSEA allows to practically estimate the P-values for a large collections of gene sets, it

168 can lead to a large number of statistically significant hits with high overlaps. To deal with this  
169 issue and make the representation of FGSEA results more concise we developed a procedure  
170 to filter the redundant gene sets. The procedure is similar to GO Trimming method [7]  
171 but is based on the Bayesian network construction approaches. It considers the significant  
172 pathways one by one and tries to remove gene sets that do not provide new information given  
173 some other pathway already present in the output. In this case, we consider a pathway  $P_1$   
174 to give a new information given a pathway  $P_2$  if the P-value of pathway  $P_1$  in the universe  
175 of genes just from  $P_2$ , or just from genes outside of  $P_2$ , is less than some threshold. This  
176 procedure allows to filter redundant pathways without requirement of having any explicit  
177 hierarchy of pathways. The full description of the procedure is given in section 2.6. The  
178 table resulting from running FGSEA on the example dataset with filtering of redundant hits  
179 is shown on Fig 3e.

180 Finally, we have explored FGSEA performance on the collection of 605 curated GEO  
181 datasets described earlier and the C5\_BP pathway collection. Notably, it took less than a  
182 minute per dataset of running time to finish FGSEA analysis with the multilevel algorithm  
183 (Fig 4a) on a laptop with 4-core Intel Core i5 processor, with a median time of 8 seconds.  
184 Besides the multilevel algorithm, the same analysis was carried out with FGSEA-simple  
185 algorithm with the sampling depth values of  $n = 10^3$ ,  $10^4$  and  $10^5$ , and the reference imple-  
186 mentation (Broad GSEA) with the sampling depth of  $10^4$ . For all these methods we compared  
187 the number of pathways reaching FDR level of 0.01: BH-adjusted P-values were used for  
188 FGSEA and reported Q-values (*Broad Q-values*) were used for the reference implementation  
189 (Fig 4b). The results reiterate that even sampling depth of  $10^5$  is not enough to detect statis-  
190 tically significant enriched pathways for some of the datasets when BH-adjustment procedure  
191 is used.

192 The *ad hoc* procedure implemented in Broad GSEA aggregates ES values generated  
193 across different pathways increasing the sensitivity on some of the datasets compared to BH-



194 adjusted P-values for the same sampling depth of  $10^4$ , however this increase in sensitivity  
195 comes with overall more conservative behavior. The total number of pathways reaching  
196 FDR level of 0.01 for Broad Q-values is 39467, which is only 60% of 65690 pathways for  
197 BH-adjustment P-values with the sampling depth of  $10^4$  and 48% of 81628 pathways for the  
198 multilevel algorithm. We further characterized this behavior by directly comparing Broad  
199 Q-values with BH-adjusted P-values and have shown that Broad Q-values are individually  
200 more conservative (Fig 4c) in a pathway size dependent manner (Fig 4d).

201 To conclude, here we have presented FGSEA method for fast preranked gene set enrich-  
202 ment analysis. The method allows to routinely estimate even very low P-values and can be  
203 used with conjunction with standard multiple hypothesis testing correction methods, such as  
204 Benjamini-Hochberg procedure. This, in turn, leads to better sensitivity and the ability to  
205 detect significant pathways in hard cases, where other implementations fail. FGSEA method  
206 is freely available as an R package at Bioconductor (<http://bioconductor.org/packages/fgsea>)  
207 and on GitHub (<https://github.com/ctlab/fgsea>).

## 208 2 Methods

### 209 2.1 Formal definitions

210 The preranked gene set enrichment analysis takes as input two objects: an array of gene-level  
211 statistic values  $S$  for the genes  $U = \{1, 2, \dots, N\}$  and a list of query gene sets (pathways)  
212  $P$ . The goal of the analysis is to determine which of the gene sets from  $P$  has a non-random  
213 behavior.

214 The statistic array  $S$  of the size  $|S| = N$  for each gene  $i \in U$  contains a value  $S_i \in \mathbb{R}$   
215 that characterizes the gene behavior in a considered biological process. Commonly, if  $S_i > 0$   
216 the expression of gene  $i$  goes up on treatment compared to control and  $S_i < 0$  means that  
217 the expression goes down. Absolute values  $|S_i|$  represent magnitude of the change. Array  
218  $S$  is sorted in a decreasing order:  $S_i > S_j$  for  $i < j$ . The value of  $N$  in practice is about  
219 10000–20000.

220 The list of gene sets  $P = \{P_1, P_2, \dots, P_M\}$  of length  $M$  usually contains groups of genes  
221 that are commonly regulated in some biological process. We assume that the gene sets  $P_i$  are  
222 ordered by their size (denoted as  $K_i$ ):  $K_1 \leq K_2 \leq \dots \leq K_M = K$ . Usually only relatively  
223 small gene sets are considered with  $K \approx 500$  genes.

224 To quantify a co-regulation of genes in a gene set  $p$  Subramanian *et al.*[1] introduced a  
225 gene set enrichment score function  $s_r(p)$  that uses gene rankings (values of  $S$ ). The more  
226 positive is the value of  $s_r(p)$  the more enriched the gene set is in the positively-regulated  
227 genes (with  $S_i > 0$ ). Accordingly, negative  $s_r(p)$  corresponds to enrichment in the negatively  
228 regulated genes.

229 Value of  $s_r(p)$  can be calculated as follows. Let  $k = |p|$ ,  $\text{NS} = \sum_{i \in p} |S_i|$ . Let also ES be

230 an array specified by the following formula:

$$ES_i = \begin{cases} 0 & \text{if } i = 0, \\ ES_{i-1} + \frac{1}{NS} |S_i| & \text{if } 1 \leq i \leq N \text{ and } i \in p, \\ ES_{i-1} - \frac{1}{N-k} & \text{if } 1 \leq i \leq N \text{ and } i \notin p. \end{cases}$$

231 The value of  $s_r(p)$  corresponds to the largest by the absolute value entry of ES:

$$s_r(p) = ES_{i^*}, \text{ where } i^* = \arg \max_i |ES_i|.$$

For convenience, we also introduce the following notation:

$$s_r^+(p) = ES_{i^+}, \quad i^+ = \arg \max_i ES_i,$$

$$s_r^-(p) = ES_{i^-}, \quad i^- = \arg \min_i ES_i.$$

232 From these two values it easy to find value of  $s_r(p)$ , which is equal to  $s_r^+(p)$  if  $|s_r^+(p)| > |s_r^-(p)|$   
 233 or  $s_r^-(p)$  otherwise.

234 Often we will consider only the positive values of the gene set enrichment score function  
 235 since:

$$\forall p \in P, \quad s_r(p) = -s'_r(p'),$$

236 where  $p' = (p'_1, p'_2, \dots, p'_k) = (N - p_1 + 1, N - p_2 + 1, \dots, N - p_k + 1)$  and  $s'_r$  corresponds to  
 237 the gene set enrichment score function for array  $S'$  such that  $S'_i = S_{N-i+1}$ .

238 Next, following Subramanian *et al* for a pathway  $p$  we define GSEA P-value as:

$$P_{value}(p) = \begin{cases} \frac{P_k(s_r(q) \geq s_r(p))}{P_k(s_r(q) \geq 0)} & \text{if } s_r(p) > 0, \\ \frac{P_k(s_r(q) \leq s_r(p))}{P_k(s_r(q) \leq 0)} & \text{if } s_r(p) < 0, \end{cases}$$

239 where  $q$  is a random gene set of size  $k$ .

## 240 **2.2 The datasets**

241 A collection of 605 curated datasets was generated from a set of all curated datasets (GDS)  
242 in Gene Expression Omnibus. Only the datasets with two biological conditions were kept.  
243 Differential expression was done using limma. The moderated t-statistic was used for gene  
244 ranking. Only top 10000 genes by average expression were used in ranking. The final  
245 rankings are available at [https://ctlab.itmo.ru/files/software/fgsea/geo\\_ranks/](https://ctlab.itmo.ru/files/software/fgsea/geo_ranks/).

246 Pathway collections C2\_REACTOME, C5\_BP, C2, C5, MSigDB were obtained via  
247 msigdb package. LINCS perturbation collection was downloaded from Enrichr web-site. The  
248 corresponding gmt files are available at <https://ctlab.itmo.ru/files/software/fgsea/gmts/>.

249 As the example ranking Th0 vs Th1 comparison was used from dataset GSE14308 [4].  
250 The differential expression was calculated using limma [8]. Only top 12000 genes by mean  
251 expression were used. Limma t-statistic was used as gene-level statistic. The script to gen-  
252 erate rankings is available on GitHub: [https://github.com/ctlab/fgsea/blob/master/inst/](https://github.com/ctlab/fgsea/blob/master/inst/gen_gene_ranks.R)  
253 [gen\\_gene\\_ranks.R](https://github.com/ctlab/fgsea/blob/master/inst/gen_gene_ranks.R).

254 Reactome [5] database was used as an example collection via reactome.db R package.  
255 For the analysis only the pathways of the size from 15 to 500 were used. The script to  
256 generate pathway collection is available on GitHub: [https://github.com/ctlab/fgsea/blob/](https://github.com/ctlab/fgsea/blob/master/inst/gene_reactome_pathways.R)  
257 [master/inst/gene\\_reactome\\_pathways.R](https://github.com/ctlab/fgsea/blob/master/inst/gene_reactome_pathways.R)

## 258 **2.3 FGSEA-simple: an algorithm for fast calculation of GSEA P-** 259 **values simultaneously for many pathways**

260 In this section we describe an algorithm for fast estimation of GSEA P-values simultaneously  
261 for a collection of pathways  $P$ . There, for each pathway  $p$  a set of  $n$  uniformly random gene

262 sets  $q_i$  are considered. Then P-value is estimated as:

$$\frac{\#\{q_i \mid s_r(q_i) \geq s_r(p)\} + 1}{\#\{q_i \mid s_r(q_i) \geq 0\} + 1}$$

263 for positively enriched pathway  $p$  and as:

$$\frac{\#\{q_i \mid s_r(q_i) \leq s_r(p)\} + 1}{\#\{q_i \mid s_r(q_i) \leq 0\} + 1}$$

264 for negatively enriched pathway. These two formulas follow Subramanian *et al.* implementa-  
265 tion, except of +1 terms, which are recommended by Phipson and Smyth [9]. Otherwise, the  
266 nominal P-values from FGSEA-simple and reference implementation are indistinguishable,  
267 however FGSEA-simple works orders of magnitude faster.

### 268 2.3.1 Cumulative statistic calculation for the mean statistic

269 Let first describe the idea of the proposed algorithm on a simple mean statistic  $s_m$ :

$$s_m(p) = \frac{1}{|p|} \sum_{i \in p} S_i.$$

270 The main idea of the algorithm is to reuse sampling for different query gene sets. This  
271 can be done due to the fact that for an estimation of null distributions samples have to be  
272 independent only for a specific gene set size, while they can be dependent between different  
273 sizes.

274 Instead of generating  $nM$  independent random gene sets:  $n$  for each of  $M$  input gene  
275 sets, we will generate only  $n$  random gene sets of size  $K$ . Let  $\pi_i$  be an  $i$ -th random gene set  
276 of size  $K$ . From that gene set we can generate gene sets for a all the query pathways  $P_j$  by  
277 using its prefix:  $\pi_{i,j} = \pi_i[1..K_j]$ .

278 The next step is to calculate the enrichment scores for all gene sets  $\pi_{i,j}$ . Instead of

279 calculating enrichment scores separately for each gene set we will calculate simultaneously  
280 scores for all  $\pi_{i,j}$  for a fixed  $i$ . Using a simple procedure it can be done in  $\Theta(K)$  time.

281 Let us find enrichment scores for all prefixes of  $\pi_i$ . This can be done by element-wise  
282 dividing of cumulative sums array by the length of the corresponding prefix:

$$s_m(\pi_i[1..k]) = \frac{1}{k} \sum_{i \in \pi_i[1..k]} S_i.$$

283 Selecting only the required prefixes takes an additional  $\Theta(m)$  time.

284 The described procedure allows to find P-values for all query gene sets in  $\Theta(n(K + m))$   
285 time. This is about  $\min(K, m)$  times faster than the straightforward procedure.

### 286 **2.3.2 Cumulative statistic calculation for enrichment score**

287 For the enrichment score  $S_r$  we use the similar idea as above: we will also be sampling only  
288 gene sets of size  $K$  and from that sample will calculate statistic values for all the other sizes.  
289 However, calculation of the cumulative statistic values for the subsamples is more complex  
290 in this case. In this section we only be considering the positive mode of enrichment statistic  
291  $s_r^+$ .

It is helpful to look at enrichment score from a geometric point of view. Let us consider  
for a pathway  $p$  of size  $|p| = k$  a graph of  $N + 1$  points (Fig. S1) with the coordinates  $(x_i, y_i)$   
for  $0 \leq i \leq N$  such that:

$$(x_0, y_0) = (0, 0), \tag{1}$$

$$x_i = x_{i-1} + [i \notin p], \quad \forall i \in 1..N, \tag{2}$$

$$y_i = y_{i-1} + [i \in p] \cdot |S_i| \quad \forall i \in 1..N. \tag{3}$$

292 The calculation of  $s_r^+$  corresponds to finding the point farthest up from a diagonal

293  $((x_0, y_0), (x_N, y_N))$ . Indeed, it is easy to see that  $x_N = N - |p| = N - k$  and  $y_N = \sum_{j \in p} |S_j| =$   
 294 NS, while the individual enrichment scores  $ES_i$  can be calculated as  $ES_i = \frac{1}{NS}y_i - \frac{1}{N-k}x_i$ .  
 295 Value of  $ES_i$  is proportional to the directed distance from the line going through  $(x_0, y_0)$  and  
 296  $(x_N, y_N)$  to the point  $(x_i, y_i)$ .

297 Let us fix a sample  $\pi$  of size  $K$ . To efficiently calculate cumulative values  $s_r^+(\pi[1..k])$  for  
 298 all  $k \leq K$  we need a fast method of updating the farthest point when a new gene is added.  
 299 In that case we can add genes from  $\pi$  one by one and calculate values  $s_r^+(\pi[1..k])$  from the  
 300 corresponding maximal distances.

Because we are calculating values for  $\pi[1..k]$  for  $k \leq K$  we know in advance which  $K$   
 genes will be added. This allows us to consider  $K + 1$  points instead of  $N + 1$  for each  
 iteration  $k$ . Let array  $o$  of size  $K$  contain the sorted order of genes in  $\pi$ : that is,  $\pi_{o_1}$  is the  
 minimal among  $\pi$ ,  $\pi_{o_2}$  is the second minimal and so on. The coordinates can be calculated  
 as follows:

$$(x_0^k, y_0^k) = (0, 0), \tag{4}$$

$$x_i^k = x_{i-1}^k + \pi_{o_i} - \pi_{o_{i-1}} - [o_i \leq k], \quad \forall i \in 1..K, \tag{5}$$

$$y_i^k = y_{i-1}^k + [o_i \leq k] \cdot |S_{o_i}|, \quad \forall i \in 1..K, \tag{6}$$

301 where we set  $\pi_{o_0}$  to be zero.

It can be shown that finding the farthest up point among (4)–(6) is equivalent to finding  
 the farthest up point among (1)–(3) with  $(x_i^k, y_i^k)$  being equal to  $(x_{\pi_{o_i}}, y_{\pi_{o_i}})$  calculated for

$p = \pi[1..k]$ . Consider  $x_{\pi_{o_i}} - x_{\pi_{o_{i-1}}}$ . By the definition of  $x$  it is equal to:

$$x_{\pi_{o_i}} - x_{\pi_{o_{i-1}}} = \sum_{j=1}^{\pi_{o_i}} [j \notin \pi[1..k]] - \sum_{j=1}^{\pi_{o_{i-1}}} [j \notin \pi[1..k]] = \sum_{j=\pi_{o_{i-1}}+1}^{\pi_{o_i}} [j \notin \pi[1..k]] = \pi_{o_i} - \pi_{o_{i-1}} - \sum_{j=\pi_{o_{i-1}}+1}^{\pi_{o_i}} [j \in \pi[1..k]].$$

302 By the definition of  $o$ , in the interval  $[\pi_{o_{i-1}} + 1, \pi_{o_i} - 1]$  there are no genes from  $\pi$  and,  
 303 thus, from  $\pi[1..k]$ . Thus we can replace the sum with its last member:

$$x_{\pi_{o_i}} - x_{\pi_{o_{i-1}}} = \pi_{o_i} - \pi_{o_{i-1}} - [\pi_{o_i} \in \pi[1..k]] = \pi_{o_i} - \pi_{o_{i-1}} - [o_i \leq k].$$

304 We got the same difference as in (5).

305 Now consider  $y_{\pi_{o_i}} - y_{\pi_{o_{i-1}}}$ . By the definition of  $y$  it is equal to:

$$y_{\pi_{o_i}} - y_{\pi_{o_{i-1}}} = \sum_{j=1}^{\pi_{o_i}} [j \in \pi[1..k]] \cdot |S_j| - \sum_{j=1}^{\pi_{o_{i-1}}} [j \in \pi[1..k]] \cdot |S_j| = \sum_{j=\pi_{o_{i-1}}+1}^{\pi_{o_i}} [j \in \pi[1..k]] \cdot |S_j|.$$

306 Again, in the interval  $[\pi_{o_{i-1}} + 1, \pi_{o_i} - 1]$  there are no genes from  $\pi[1..k]$ . Thus we can  
 307 replace the sum with only the last member:

$$y_{\pi_{o_i}} - y_{\pi_{o_{i-1}}} = [\pi_{o_i} \in \pi[1..k]] \cdot |S_{o_i}| = [o_i \leq k] \cdot |S_{o_i}|.$$

308 We got the same difference as in (6).

309 We do not need to consider other points, because points from  $o_{i-1}$  to  $o_i - 1$  have the same  
 310  $y$  coordinate and  $o_{i-1}$  is the leftmost of them. Thus, when at least one gene is added the diag-  
 311 onal  $((x_0, y_0), (x_N, y_N))$  is not horizontal and  $o_{i-1}$  is the farthest point among  $o_{i-1}, \dots, o_i - 1$ .

312 Now let consider what happens with the enrichment score graph when gene  $\pi_k$  is added



313 to the query set  $\pi[1..k-1]$  (Fig. S2). Let  $r_k$  be a rank of gene  $\pi_k$  among genes  $\pi$ , then  
314 coordinate of points  $(x_i, y_i)$  for  $i < r_k$  do not change, while all  $(x_i, y_i)$  for  $i \geq r_k$  are changed  
315 on  $(\Delta_x, \Delta_y) = (-1, |S_{\pi_k}|)$ .

316 To make fast incremental updates we will decompose the problem into multiple smaller  
317 ones. For simplicity we assume that  $K+1$  is an exact square of an integer  $b$ . Let split  $K+1$   
318 points into  $b$  consecutive blocks of the size  $b$ :  $\{(x_0^k, y_0^k), \dots, (x_{b-1}^k, y_{b-1}^k)\}, \{(x_b^k, y_b^k), \dots, (x_{2b-1}^k, y_{2b-1}^k)\}$   
319 and so on.

320 For each of  $b$  blocks we will store and update the farthest up point from the diagonal.  
321 When we know for each block its farthest point we can find the globally farthest point by a  
322 simple pass in  $O(b)$  time.

323 Next, we show how to update the farthest points in blocks in amortized time  $O(b)$ . This  
324 taken together with one  $O(b)$  pass will get us an algorithm to update the globally farthest  
325 point in amortized  $O(b)$  time.

326 Below we use  $c = \lfloor r_k/b \rfloor$  as an index of a block where gene  $\pi_k$  belongs, where  $r_k$  is the  
327 ranking of the genes from  $\pi$ , i.e.  $r_{o_i} = i$ .

328 First, we describe the procedure to update point coordinates. We will store  $x_i$  coordinates  
329 using two vectors:  $B$  of size  $b$  and  $D$  of size  $K+1$ , such that  $x_i = B_{i/b} + D_i$ . When gene  
330  $\pi_k$  is added all  $x_i$  for  $i \geq r_k$  are decremented by one. To reflect this we will decrement all  
331  $B_j$  for  $j > c$  and decrement all  $D_i$  for  $r_k \leq i < cb$ . The update takes  $O(b)$  time. After this  
332 update procedure we can get value  $x_i$  in  $O(1)$  time. The same procedure is applied for  $y$   
333 coordinates.

334 Second, for each block we will maintain an upper part of its convex hull. Having convex  
335 hull is useful because the farthest point in block always lays on its convex hull. All blocks  
336 except  $c$  have the points either not changed or shifted simultaneously on the same value. That  
337 means that the lists of points on the convex hulls for these blocks remain unchanged. For  
338 the block  $c$  we can reconstruct convex hull from scratch using Graham scan algorithm [10].

339 Because the points are already sorted by  $x$  coordinate, this reconstruction takes  $O(b)$  time.  
340 In total, it takes  $O(b)$  time to update the convex hulls.

341 Third, the farthest points in blocks can be updated using the stored convex hulls. Con-  
342 sider a block where the convex hull was not changed (every block except, possibly, block  $c$ ).  
343 Because diagonal always rotates in the same counterclockwise direction, the farthest point  
344 in block on iteration  $k$  either stays the same or moves on the convex hull to the left of the  
345 farthest point on the  $(k - 1)$ -th iteration. Thus, for each such block we can compare current  
346 farthest point with its left neighbor on the convex hull and update the point if necessary. It  
347 is repeated until the next neighbor is closer to the diagonal than the current farthest point.  
348 In the block  $c$  we just find the farthest point in a single pass by the points on the convex  
349 hull.

350 To show that the updating the farthest points takes  $O(b)$  amortized time we will use  
351 potential method. Let a potential after adding  $k$ -th gene  $\Phi_k$  be a sum of relative indexes  
352 of the farthest points for all the blocks. As there are  $b$  blocks of size  $b$  the sum of relative  
353 indexes lies between 0 and  $b^2$ . Thus,  $\Phi_k = O(b^2)$ . For an update of all  $b - 1$  blocks except  $c$   
354 we need to make  $t_k = b - 1 + z$  operations of comparing two points, where  $z$  is the number  
355 of times the farthest points were updated. This can take up to  $\Theta(b^2)$  time in the worst case.  
356 However, it can be noticed, that potential change  $\Phi_k - \Phi_{k-1}$  is equal to  $-z + O(b)$ : the sum  
357 of indexes is decreased by a number of times the farthest points were updated plus  $O(b)$  for  
358 the block  $c$  where the index can go from 0 to  $b - 1$ . This gives an amortized cost of  $k$ -th  
359 iteration to be  $a_k = t_k + \Phi_k - \Phi_{k-1} = b - 1 + z - z + O(b) = O(b)$ . The total real cost of  $K$   
360 iterations is  $\sum_{k=1}^K a_k + \Phi_0 - \Phi_K = O(Kb) + O(b^2) = O(Kb)$ , which means amortized cost of  
361 one iteration to be  $O(b)$ .

362 Taken together the algorithm allows to find all cumulative enrichment scores  $s_r(\pi[1..k])$   
363 in  $O(Kb) = O(K\sqrt{K})$  time. The straightforward implementation of calculating cumulative  
364 values from scratch would take  $O(K^2 \log K)$  time. Thus, we have improved the performance

365  $O(K \frac{\log K}{\sqrt{K}})$  times.

### 366 **2.3.3 Implementation details**

367 We also implemented an optimization so that the algorithm does not build convex hull from  
368 scratch for a changed block  $c$ , but only updates the changed points. This does not influence  
369 the asymptotic performance, but decreases the constant factor.

370 First, we start updating the convex hull from position  $r_k$  and not from the start. To be  
371 able to do this, we have an array `prev` that for each gene  $g \in \pi$  stores the previous point on  
372 the convex hull if  $g$  were the last gene in the block. This actually is the same as the top of  
373 the stack in Graham algorithm and represent the algorithms state for any given point. As  
374 all points  $h$  to the left of  $g$  are not changed `prevh` also remains unchanged and need not to  
375 be recalculated.

376 Second, we stop updating the hull, when we reach the point on the previous iteration  
377 convex hull. We can do this because every point to the left of  $g$  is rotated counterclockwise  
378 of any point to the right of  $g$ , which means that the first point on the convex hull right of  $g$   
379 on  $(k - 1)$ -th iteration remains being a convex hull point at  $k$ -th iteration.

## 380 **2.4 An algorithm for exact calculation of GSEA P-values for integer** 381 **gene-level statistics**

382 In this section we describe a polynomial algorithm to calculate GSEA P-value exactly, but  
383 only for the case when gene-level statistics are integer numbers:  $S_i \in \mathbb{Z}$ . For simplicity we  
384 will consider a problem of calculating the following probability:

$$P(s_r^+(q) \geq \gamma),$$

385 where  $q$  is a random gene set of size  $k$ . We also assume  $\gamma > 0$ .

386 Let denote the sum of  $k$  largest absolute values of gene ranks by  $T$ . The algorithm will  
 387 be polynomial in terms of  $N$ ,  $k$  and  $T$ .

### 388 2.4.1 The basic algorithm

389 Let us consider a gene set  $q = \{q_1, q_2, \dots, q_k\}$ . Recall the formula for  $s^+(q)$ :

$$s^+(q) = \text{ES}_{i^+}, \text{ where } i^+ = \arg \max_i \text{ES}_i,$$

$$\text{ES}_i = \begin{cases} 0, & \text{if } i = 0, \\ \text{ES}_{i-1} + \frac{1}{\text{NS}}|S_i|, & \text{if } 1 \leq i \leq N \text{ and } i \in q, \\ \text{ES}_{i-1} - \frac{1}{N-k}, & \text{if } 1 \leq i \leq N \text{ and } i \notin q. \end{cases}$$

390 First, let rewrite the formula for  $\text{ES}_i$  in an equivalent fashion, grouping positive and  
 391 negative summands:

$$392 \text{ES}_i = \frac{1}{\text{NS}} \left( \sum_{j=1}^i [j \in q] |S_j| \right) - \frac{1}{N-k} \left( i - \sum_{j=1}^i [j \in q] \right).$$

393 Then for calculating  $\text{ES}_i$  the following values are sufficient:

- 394 •  $i$ : the index of the current gene;
- 395 •  $c = \sum_{j=1}^i [j \in q]$ : the number of genes included into the set  $q$  among genes 1.. $i$ ;
- 396 •  $s = \sum_{j=1}^i [j \in q] |S_j|$ : the sum of the absolute values of gene-level statistics for genes  
 397 included in the set among genes 1.. $i$ ;
- 398 •  $\text{NS} = \sum_{j=1}^N [j \in q] |S_j|$ : the sum of the absolute values of gene-level statistics for *all* genes  
 399 in the set.

400 Knowing the values above,  $\text{ES}_i$  can be calculated as  $\text{ES}_i = \frac{s}{\text{NS}} - \frac{i-c}{N-k}$ .

401 Notice that NS can take only integer values from 0 to  $T$  (for a set of genes with the  
 402 largest absolute values of gene-level statistics). Let us split the desired probability to a sum  
 403 of independent probabilities based on the value of NS:

$$404 \quad P(s^+(q) \geq \gamma) = \sum_{\text{NS}=0}^T P \left( \left( \sum_{j \in q} |S_j| = \text{NS} \right) \wedge (s^+(q) \geq \gamma) \right).$$

405 Our algorithm will be based on *dynamic programming*. For each possible value of NS  
 406 we will process the genes one by one in increasing order of index and calculate an array  
 407  $f_{\text{NS}}(i, c, s)$ . The value  $f_{\text{NS}}(i, c, s)$  will contain the probability for a uniformly random gene  
 408 set  $q'$  of  $c$  genes selected from genes 1.. $i$  to simultaneously have the following two properties:

- 409 1. the sum of the absolute values of gene-level statistics of genes from  $q'$  is equal to  $s$ ;
- 410 2.  $\text{ES}_j < \gamma$  holds for all  $j \leq i$ , where the values of ES are calculated for the gene set  $q'$   
 411 but using the selected values of NS and  $k$ , not the ones calculated for the set  $q'$ .

412 Suppose that we have calculated all values of  $f_{\text{NS}}(i, c, s)$ , then

$$413 \quad P \left( \left( \sum_{j \in q} |S_j| = \text{NS} \right) \wedge (s^+(q) < \gamma) \right) = f_{\text{NS}}(N, k, \text{NS})$$

414 and

$$415 \quad P(s^+(q) < \gamma) = \sum_{\text{NS}=0}^T f_{\text{NS}}(N, k, \text{NS}).$$

416 Finally, the sought probability is equal to:

$$417 \quad P(s^+(q) \geq \gamma) = 1 - P(s^+(q) < \gamma) = 1 - \sum_{\text{NS}=0}^T f_{\text{NS}}(N, k, \text{NS}).$$

418 Let us find a formula for  $f_{\text{NS}}(i, c, s)$ . The base case of dynamic programming is  $i = 0$  for  
 419 all NS:

$$f_{\text{NS}}(0, c, s) = \begin{cases} 1, & \text{if } c = s = 0, \\ 0, & \text{otherwise.} \end{cases}$$

420 Suppose we want to calculate  $f_{\text{NS}}(i, c, s)$  for some  $i > 0$ . First, calculate

$$421 \quad \text{ES}_i = \frac{s}{\text{NS}} - \frac{i-c}{N-k}$$

422 and compare it to  $\gamma$ . If  $\text{ES}_i \geq \gamma$ , then  $f_{\text{NS}}(i, c, s) = 0$  by definition.

423 Otherwise, condition “ $\text{ES}_j < \gamma$  holds for all  $j \leq i$ ” can be simplified to “ $\text{ES}_j < \gamma$  holds  
424 for all  $j \leq i - 1$ ”. This observation allows us to use values of  $f$  that have already been  
425 calculated. Consider two cases:

- 426 1. Gene  $i$  does not belong to the set  $q'$ . As  $q'$  is a set of  $c$  genes chosen uniformly at random  
427 from  $i$  genes, this case happens with the probability  $\frac{i-c}{i}$ . The conditional probability  
428 that such set satisfies the two necessary properties is  $f_{\text{NS}}(i-1, c, s)$ . Indeed, any set of  
429 size  $c$  with the sum of absolute values of gene-level statistics values equal to  $s$ , chosen  
430 among genes 1.. $i-1$  and satisfying the conditions on ES, is a valid set chosen among  
431 genes 1.. $i$ . Similarly, if a set does not satisfy the condition on  $\text{ES}_j$  for some  $j \leq i-1$ ,  
432 this set should not be counted towards  $f_{\text{NS}}(i, c, s)$  since obviously  $j \leq i$ .
- 433 2. Gene  $i$  belongs to the set. This case happens with the probability  $\frac{c}{i}$ . The probability  
434 that this set satisfies the necessary conditions is  $f_{\text{NS}}(i-1, c-1, s-S_i)$ . Indeed, any  
435 set of size  $c-1$  with the sum of absolute values of gene-level statistics equal to  $s-S_i$ ,  
436 chosen among genes 1.. $i-1$  and satisfying the conditions on ES, can be extended with  
437 gene  $i$ , thus forming a set of size  $c$  satisfying both necessary properties. Similarly, if a  
438 set does not satisfy the condition on  $\text{ES}_j$  for some  $j \leq i-1$ , adding gene  $i$  will not fix  
439 the situation.

440 Then we can calculate  $f_{\text{NS}}(i, c, s)$  using the law of total probability:

$$f_{\text{NS}}(i, c, s) = \frac{i-c}{i} f_{\text{NS}}(i-1, c, s) + \frac{c}{i} f_{\text{NS}}(i-1, c-1, s-S_i),$$

441 in the case when  $i > 0$  and  $\text{ES}_i < \gamma$ .

442 Putting all the cases together, we arrive to the final formula for  $f_{NS}(i, c, s)$ :

$$f_{NS}(i, c, s) = \begin{cases} 1, & \text{if } i = c = s = 0, \\ 0, & \text{if } i = 0 \text{ and either } c \neq 0 \text{ or } s \neq 0, \\ 0, & \text{if } i > 0 \text{ and } \frac{s}{NS} - \frac{i-c}{N-k} \geq s^+(p), \\ \frac{i-c}{i} f_{NS}(i-1, c, s) + \\ \frac{c}{i} f_{NS}(i-1, c-1, s-S_i), & \text{otherwise.} \end{cases}$$

443 The overall complexity of the algorithm is  $O(NkT^2)$ . The values of  $f$  can be evaluated  
 444 sequentially in increasing order of  $i$ . It is enough to evaluate  $f_{NS}(i, c, s)$  for  $0 \leq i \leq N$ ,  
 445  $0 \leq c \leq k$ , and  $0 \leq s \leq NS \leq T$ . Each value of  $f$  can be evaluated in constant time.

#### 446 2.4.2 Optimizations and implementation details

447 While the algorithm described above is polynomial, a number of further optimizations are  
 448 required to make execution on real size inputs feasible.

449 First, let note that the following property holds:  $f_{NS_2}(i, c, s) \geq f_{NS_1}(i, c, s)$  as long as  
 450  $NS_2 \geq NS_1$ . Indeed, ES values calculated using different values of NS are decreasing when  
 451 NS is increased. That means all gene sets counted towards  $f_{NS_1}(i, c, s)$  should also be counted  
 452 towards  $f_{NS_2}(i, c, s)$  if  $NS_2 \geq NS_1$ .

453 Following the observation above, instead of calculating values of  $f_{NS}(i, c, s)$  we will con-  
 454 sider the values  $g(i, c, s, b) = f_{b+1}(i, c, s) - f_b(i, c, s)$ . These values will contain the probability  
 455 of a random gene set  $q$  of size  $k$  selected uniformly from genes  $1..N$  to satisfy simultaneously  
 456 the following three properties:

- 457 1. set  $q$  contains exactly  $c$  genes from the genes  $1..i$ .

- 458 2. the sum of the absolute values of gene-level statistics of the first  $c$  genes from  $q$  is equal  
459 to  $s$ ;
- 460 3.  $ES_j < \gamma$  holds for all  $j \leq i$ , where the values of ES are calculated for the gene set  $q$   
461 using  $NS = b + 1$  (and for all higher values of NS);
- 462 4.  $ES_j \geq \gamma$  holds for at least one  $j \leq i$ , where the values of ES are calculated for the gene  
463 set  $q$  using  $NS = b$  (and for all lower values of NS).

464 The sought probability can be calculated from values of  $g$  as follows:

$$465 \quad P(s^+(q) \geq \gamma) = 1 - P(s^+(q) < \gamma) = 1 - \sum_{NS=0}^T \sum_{b=0}^{NS} g(N, k, NS, b).$$

466 To calculate the values of  $g$  we will use the forward dynamic programming algorithm.  
467 In this algorithm we expand a tree of reachable dynamic programming states, starting from  
468  $g(0, 0, 0, 0)$  which is equal to 1.

469 The states will be considered by “levels” in an increasing order of  $i$ . The values  $g(i +$   
470  $1, c, s, b)$  from  $(i + 1)$ -th level are calculated based on level  $i$ . Note, that the sum of values  
471 on  $i$ -th level is always equal to 1.

472 To calculate all values from the  $(i + 1)$ -th level all non-zero values from the  $i$ -th level are  
473 considered sequentially. Let consider state  $(i, c, s, b)$  and let define  $p = (k - c)/(N - i)$  – the  
474 probability that gene  $i + 1$  will be added to the set. The corresponding set  $G(i, c, s, b)$  can  
475 be divided into two groups.

- 476 1. The gene sets from  $G(i, c, s, b)$  that do not include gene  $i + 1$ . These gene sets are  
477 included into gene sets  $G(i + 1, c, s, b)$  on the level  $i + 1$ . Thus the corresponding  
478 probability  $g(i, c, s, b) \cdot (1 - p)$  is added to the value of  $g(i + 1, c, s, b)$ .
- 479 2. The gene sets from  $G(i, c, s, b)$  that do include gene  $i + 1$ . These gene sets are included  
480 into  $G(i + 1, c + 1, s' = s + |S_{i+1}|, b')$  where  $b'$  is an updated bound. To calculate



481  $b'$  let note that  $ES_j$  will be greater or equal to  $\gamma$  iff  $\frac{s'}{NS} - \frac{(i+1)-(c+1)}{N-k} \geq \gamma$  which is  
482 equivalent to  $NS \leq \frac{s'}{\frac{i-j}{N-k} + \gamma}$ . Thus  $b' = \max\left(b, \left\lfloor \frac{s'}{\frac{i-j}{N-k} + \gamma} \right\rfloor\right)$  The probability that is  
483 added to  $g(i+1, c+1, s', b')$  is equal to  $g(i, c, s, b) \cdot p$ .

484 While the asymptotic number of states remains to be  $O(NkT^2)$  the forward dynamic  
485 programming allows to consider only “reachable” gene stats with  $g(i, c, s, b) > 0$ . In practice  
486 the number of reachable stats can be several orders of magnitude smaller than the total  
487 states.

488 Furthermore, for the algorithm we can consider only states with  $g(i, c, s, b) > \varepsilon$  to be  
489 reachable for some small value of  $\varepsilon$ . If we do not consider the unreachable states we would  
490 not be able to calculate the desired probability exactly. However, if we calculate the value  
491 of  $\delta$  as a sum of all the skipped states values, the desired probability will be calculated with  
492 the absolute error no more than  $\delta$ .

493 The algorithm implementation with few other optimizations is available at: [https://](https://github.com/ctlab/fgsea/blob/master/inst/exact/exact.cpp)  
494 [github.com/ctlab/fgsea/blob/master/inst/exact/exact.cpp](https://github.com/ctlab/fgsea/blob/master/inst/exact/exact.cpp).

## 495 **2.5 FGSEA-multilevel: an algorithm for calculation of arbitrar-** 496 **ily low P-values using adaptive multilevel split Monte Carlo** 497 **scheme**

498 In this section we describe FGSEA-multilevel algorithm that can accurately estimate GSEA  
499 P-value for a pathway  $p$  of size  $k$  even when the true P-value is very small.

500 Let  $\gamma = s_r(p) > 0$  be the enrichment score of the query pathway  $p$  for which we want to  
501 calculate the following value:

$$\frac{P(s_r(q) \geq \gamma)}{P(s_r(q) \geq 0)},$$

502 where  $q$  is a random gene set of size  $k$ . This probability can be rewritten as follows:

$$\frac{P(s_r(q) \geq \gamma)}{P(s_r(q) \geq 0)} = \frac{P(s_r^+(q) \geq \gamma) \cdot P(s_r(q) \geq 0 \mid s_r^+(q) \geq \gamma)}{P(s_r(q) \geq 0)}.$$

503 First, we focus on determining the probability  $P(s_r^+(q) \geq \gamma)$ . This probability can be  
504 extremely small, so using a naive sampling gives a bad estimation. We use the adaptive  
505 multilevel split Monte Carlo method [6] to solve this problem.

To estimate the probability  $P(s_r^+(q) \geq \gamma)$  we split the enrichment scores into levels  
 $0 = l_0 < l_1 < \dots < l_t = \gamma$ . Then we can define the following probabilities:

$$\begin{aligned} P(s_r^+(q) \geq l_1 \mid s_r^+(q) \geq l_0) &= \alpha_1, \\ P(s_r^+(q) \geq l_2 \mid s_r^+(q) \geq l_1) &= \alpha_2, \\ &\dots \\ P(s_r^+(q) \geq l_t \mid s_r^+(q) \geq l_{t-1}) &= \alpha_t. \end{aligned}$$

506 Now the probability  $P(s_r^+(q) \geq \gamma)$  can be rewritten as  $\prod_{i=1}^t \alpha_i$ .

507 To estimate  $\alpha_i$  we can draw a sample  $\{q_1^i, q_2^i, \dots, q_Z^i\}$  of size  $Z$  from a conditional distri-  
508 bution  $P(\cdot \mid s_r^+(q) \geq l_{i-1})$ . Then

$$\alpha_i \approx \frac{Z_i}{Z},$$

509 where  $Z_i$  is the number of elements in the set  $\{q_j^i \mid s_r^+(q_j^i) \geq l_i\}$ .

510 Below we show how levels  $l_i$  can be chosen and how to sample from the corresponding  
511 conditional distributions.

### 512 2.5.1 Choosing the enrichment score levels

513 We propose to chose value for a level  $l_i$  as a median of the enrichment scores for the  $q_j^i$   
514 sample. For simplicity  $Z$  is required to be an odd number.

515 Then the procedure for estimating probability  $P(s_r^+(q) \geq \gamma)$  consists of repetition of the

516 following steps:

- 517 1. On iteration  $i \geq 1$  sample  $Z$  gene sets  $q_j^i$  of size  $k$  from the distribution  $P(\cdot \mid s_r^+(q) \geq l_{i-1})$ .
- 518 2. Set the level  $\tilde{l}_i$  to be equal to the median of values  $s_r^+(q_j^i)$ .
- 519 3. If  $\tilde{l}_i > \gamma$  then stop the iterations and set  $l_i = \gamma$  and  $t = i$ , otherwise set  $l_i = \tilde{l}_i$ .

520 As a result, by construction,  $\alpha_i \approx 1/2$  for  $1 \leq i \leq t - 1$ . The value of  $\alpha_t$  can be  
 521 approximated as  $Z_t/Z$  (which is always  $\geq 1/2$ ). Together we get the following expression for  
 522 estimating the desired probability:

$$P(s_r^+(q) \geq \gamma) \approx 2^{-(t-1)} \cdot \frac{Z_t}{Z}.$$

### 523 2.5.2 The conditional sampling implementation

524 To generate a uniform sample  $q_j^i$  from the conditional distribution  $P(\cdot \mid s_r^+(q) \geq l_{i-1})$  we  
 525 use the Metropolis algorithm.

526 First, we generate a sample  $q_1^1, q_2^1, \dots, q_Z^1$  of size  $Z$  from the distribution  $P(\cdot \mid s_r^+(q) \geq l_0)$ .  
 527 Since  $l_0 = 0$  and values of  $s_r^+$  are always non-negative it can be done by generating a uniformly  
 528 random subset of size  $k$  from the genes  $\{1, 2, \dots, N\}$ .

529 Now let consider a sample  $q_1^{i-1}, q_2^{i-1}, \dots, q_Z^{i-1} \sim P(\cdot \mid s_r^+(q) \geq l_{i-2})$  at a step  $i > 1$ . The  
 530 sample can be sorted in an increasing order of enrichment score values:  $s_r^+(q_{(1)}^{i-1}) \leq s_r^+(q_{(2)}^{i-1}) \leq$   
 531  $\dots \leq s_r^+(q_{(Z)}^{i-1})$ . Let  $d = \lceil Z/2 \rceil$ . The level  $l_{i-1}$  is the median of the values  $s_r^+(q_j^{i-1})$  and, thus,  
 532 is equal to  $l_{i-1} = s_r^+(q_{(d)}^{i-1})$ .

533 Let first populate  $q_j^i$  in the following way:

$$q_j^i = \begin{cases} q_{(Z+1-j)}^{i-1}, & \text{if } j < d, \\ q_{(j)}^{i-1}, & \text{otherwise.} \end{cases}$$

534 This gives us a sample from the conditional distribution  $P(\cdot \mid s_r^+(q) \geq l_{i-1})$ , however it is

535 not uniform.

536 To make the sample uniform we apply a number of the Metropolis algorithm iterations.

537 On each iteration for each gene set  $q_j^i$  we apply the following steps:

538 1. Choose a random gene  $g \in q_j^i$ .

539 2. Choose a random gene  $g' \notin q_j^i$ .

540 3. Consider  $\tilde{q}_j^i = q_j^i \setminus \{g\} \cup \{g'\}$ . If  $s_r^+(\tilde{q}_j^i) \geq l_{i-1}$  then we replace  $q_j^i$  with  $\tilde{q}_j^i$ .

541 The iterations are repeated until the total number of successful replacements becomes  
542 greater or equal to  $k \cdot Z$ . In practice, this number of steps is enough to get a sufficiently  
543 uniform sample to obtain a good estimation of probability, without a significant increase in  
544 the running time of the algorithm.

### 545 2.5.3 Estimating the P-value

546 In order to estimate the desired P-value we also need to calculate the probabilities  $P(s_r(q) \geq 0)$

547 and  $P(s_r(q) \geq 0 \mid s_r^+(q) \geq \gamma)$ .

548 To calculate the probability  $P(s_r(q) \geq 0)$  we generate gene sets  $q_1, q_2, \dots, q_{Z'}$ , where  
549 each sample  $q_i$  is selected uniformly at random from all the subsets of size  $k$  from the  
550 set  $\{1, 2, \dots, N\}$ . The samples are generated until the number of samples  $q_i$  with  $s_r(q_i) \geq 0$   
551 becomes equal to  $Z$ . Then the probability  $P(s_r(q) \geq 0)$  is estimated as follows

$$P(s_r(q) \geq 0) \approx \frac{Z}{Z'}$$

552 To determine the remaining probability  $P(s_r(q) \geq 0 \mid s_r^+(q) \geq \gamma)$  we calculate the number  
553 of gene sets in  $\{q_j^t \mid s_r^+(q_j^t) \geq \gamma\}$  with value of the enrichment score function  $s_r$  is greater  
554 than zero. After that, the probability can be estimated as follows:

$$P(s_r(q) \geq 0 \mid s_r^+(q) \geq \gamma) \approx \frac{\#\{q_j^t \mid s_r^+(q_j^t) \geq \gamma \wedge s_r(q_j^t) \geq 0\}}{\#\{q_j^t \mid s_r^+(q_j^t) \geq \gamma\}}$$

#### 555 2.5.4 Estimating log-probability

556 To properly estimate a logarithm of the desired probability let note that the  $j$ -th order statis-  
557 tic of a standard uniform sample of size  $Z$  is a random variable from the beta distribution  
558 Beta( $j, Z + 1 - j$ ). Therefore, we can use the properties of the beta distribution and make  
559 correct transition to the logarithm of probability. So for the median value of sample of odd  
560 size  $Z$  we have:

$$E[\log \alpha_i] = \psi\left(\frac{Z+1}{2}\right) - \psi(Z+1) \text{ for } i \in \{1, 2, \dots, t-1\},$$

561 where  $\psi$  is digamma function. In the same way, we can calculate the expectation of the  
562 logarithm  $\alpha_t$ :

$$E[\log \alpha_t] = \psi(Z_t + 1) - \psi(Z + 1).$$

563 Then the logarithm of probability  $P(s_r^+(q) \geq \gamma)$  is estimated as

$$\log P(s_r^+(q) \geq \gamma) \approx (t-1) \cdot \left( \psi\left(\frac{Z+1}{2}\right) - \psi(Z+1) \right) + \psi(Z_t + 1) - \psi(Z + 1).$$

564 Similarly, we can estimate the variance of the estimates  $\text{var}[\log \alpha_i] = \psi_1\left(\frac{Z+1}{2}\right) - \psi_1(Z+1)$ ,  
565 where  $\psi_1$  is trigamma function. From this we can approximate a standard error of our esti-  
566 mator as:

$$\text{sd} = \sqrt{t \cdot \left( \psi_1\left(\frac{Z+1}{2}\right) - \psi_1(Z+1) \right)}.$$

567 The same approach with digamma functions is used to calculate the logarithm of the  
568 probabilities  $P(s_r(q) \geq 0 | s_r^+(q) \geq \gamma)$  and  $P(s_r(q) \geq 0)$ .

## 569 2.5.5 Optimizations and implementation details

570 The most demanding step of FGSEA-multilevel algorithm is to check whether the newly  
571 obtained gene set has the enrichments score value of at least  $l_i$ . Importantly, this does not  
572 require full computation of enrichment score value. It is enough to show that there is at least  
573 one gene that has the running enrichment score value of at least  $l_i$  or, in other words, that  
574 at least one point on the enrichment score graph is farther away from the diagonal (Fig. S1)  
575 than some value calculated from  $l_i$ .

576 Similarly to FGSEA-simple algorithm, a square root decomposition is used to split all the  
577 genes into approximately  $\sqrt{K}$  blocks. The block boundaries are determined automatically on  
578 each level based on the existing sample in such a way, that each block contains approximately  
579  $\sqrt{K}$  genes. In particular this decomposition enables adding and removing genes in  $O(\sqrt{K})$   
580 time while keeping the gene set sorted.

581 Unlike FGSEA-simple algorithm we will not maintain the convex hull but will apply a  
582 few heuristics to do the required check faster.

583 First we check a "candidate" point which has a high chance to be at the required distance  
584 from the diagonal. If it is so, we do not have to continue the check. The "candidate" gene  
585 is carried over from the previous iterations, as the point where the successful check has been  
586 interrupted.

587 Next we go block by block. At the beginning we construct a "rectangle" upper bound  
588 on the enrichment score value at the block, which can be obtained by moving all the genes  
589 of the block to its start. If this upper bound does not satisfy our criterion we can skip the  
590 block. Otherwise, we go gene by gene and calculate the enrichment score values until it  
591 reaches the required value or the end of the block is reached. In the former case the check is  
592 interrupted with a successful result.

### 593 2.5.6 Comparison with the exact method

594 To compare FGSEA-multilevel and the exact method on the same dataset we used rounded  
595 values of the gene-level statistics from the example data (section 2.2) as input data for both  
596 algorithms. Both algorithms calculated the probability  $P(s_r^+(q) \geq \gamma)$ .

597 The results of the algorithms for the pathways from the example data are shown on  
598 Fig 3c. The exact algorithm was run with  $\varepsilon = 10^{-40}$ , all the probabilities were obtained with  
599 accuracy of at least six significant digits. For FGSEA-multilevel  $Z = 101$  was used.

600 We also calculated empirical estimation errors and compared it to the theoretical ones  
601 (Fig 3d). For this we generated 100 independent estimates for a range of ES values (corre-  
602 sponding to P-values of  $10^{-4}$  to  $10^{-100}$ , gene set sizes (from 15 to 250) and sample size (from  
603 101 to 1001). The raw values are available in the Supplementary Table.

## 604 2.6 Filtering redundant pathways

605 In this section we describe an algorithm to filter redundant pathways from the results of  
606 FGSEA.

607 Let consider two pathways  $p_1$  and  $p_2$  that both have a significant GSEA P-value. There  
608 are two situations in which we will consider  $p_2$  to be non-redundant given  $p_1$ :

- 609 1. If pathway  $p_2$  is enriched even if we do not consider the genes from  $p_1$  at all. Formally,  
610 we calculate GSEA P-value for gene set  $p_2 \setminus p_1$  and gene-level statistics vector  $S[U \setminus p_1]$   
611 for all the genes except  $p_1$ . If the P-value is less than a pre-defined threshold, then  
612 pathway  $p_2$  is considered as non-redundant given  $p_1$ .
- 613 2. If pathway  $p_2$  is enriched even if we consider only genes from  $p_1$ . Formally, we calculate  
614 GSEA P-value for gene set  $p_2 \cap p_1$  and gene-level statistics vector  $S[p_1]$  for the genes  
615 from  $p_1$ . Again, if the P-value is less than a pre-defined threshold, then pathway  $p_2$  is  
616 considered as non-redundant given  $p_1$ .

617 Otherwise pathway  $p_2$  is considered to be redundant.

618 The filtering procedure starts with a set of significantly enriched pathways  $P_{sig}$  selected  
619 by the user: for example the pathways with GSEA P-values less than 0.01 after Benjamini-  
620 Hochberg correction, sorted by P-value. The output of the procedure is a list  $P_{main} \subset P_{sig}$   
621 of pathways that are pairwise non-redundant. At the same time, all the other pathways  
622  $P_{red} = P_{sig} \setminus P_{main}$  are redundant given some pathway from  $P_{sig}$ .

623 The procedure itself is similar to Sieve of Eratosthenes algorithm. The pathways are  
624 considered one by one and some of them are marked as redundant. For a pathway  $p$  we first  
625 check if it is already marked as redundant, if yes, we go to the next pathway. Otherwise,  
626 we first run FGSEA-simple algorithm on a vector of statistics  $S[U \setminus p]$  and all the pathway  
627 currently not marked as redundant (including the ones that already have been considered,  
628 but excluding pathway  $p$ ). Then, similarly, we run FGSEA-simple algorithm on a vector of  
629 statistics  $S[p]$ . Pathways that do not achieve non-redundant P-value threshold in both tests  
630 are marked as redundant.

## 631 References

- 632 [1] Aravind Subramanian, Pablo Tamayo, Vamsi K Mootha, Sayan Mukherjee, Benjamin L  
633 Ebert, Michael A Gillette, Amanda Paulovich, Scott L Pomeroy, Todd R Golub, Eric S  
634 Lander, and Jill P Mesirov. Gene set enrichment analysis: a knowledge-based approach  
635 for interpreting genome-wide expression profiles. *Proceedings of the National Academy  
636 of Sciences of the United States of America*, 102(43):15545–50, 2005.
- 637 [2] G. Yu, L. G. Wang, G. R. Yan, and Q. Y. He. DOSE: an R/Bioconductor package for  
638 disease ontology semantic and enrichment analysis. *Bioinformatics*, 31(4):608–609, Feb  
639 2015.



- 640 [3] L. Varemo, J. Nielsen, and I. Nookaew. Enriching the gene set analysis of genome-  
641 wide data by incorporating directionality of gene expression and combining statistical  
642 hypotheses and methods. *Nucleic Acids Res.*, 41(8):4378–4391, Apr 2013.
- 643 [4] Gang Wei, Lai Wei, Jinfang Zhu, Chongzhi Zang, Jane Hu-Li, Zhengju Yao, Kairong  
644 Cui, Yuka Kanno, Tae-Young Roh, Wendy T Watford, Dustin E Schones, Weiqun Peng,  
645 Hong-Wei Sun, William E Paul, John J O’Shea, and Keji Zhao. Global mapping of  
646 H3K4me3 and H3K27me3 reveals specificity and plasticity in lineage fate determination  
647 of differentiating CD4+ T cells. *Immunity*, 30(1):155–67, 2009.
- 648 [5] G Joshi-Tope, M Gillespie, I Vastrik, P D’Eustachio, E Schmidt, B de Bono, B Jassal,  
649 G R Gopinath, G R Wu, L Matthews, S Lewis, E Birney, and L Stein. Reactome: a  
650 knowledgebase of biological pathways. *Nucleic acids research*, 33(Database issue):D428–  
651 32, 2005.
- 652 [6] Zdravko I Botev and Dirk P Kroese. An efficient algorithm for rare-event probability  
653 estimation, combinatorial optimization, and counting. *Methodology and Computing in  
654 Applied Probability*, 10(4):471–505, 2008.
- 655 [7] S. G. Jantzen, B. J. Sutherland, D. R. Minkley, and B. F. Koop. GO Trimming:  
656 Systematically reducing redundancy in large Gene Ontology datasets. *BMC Res Notes*,  
657 4:267, Jul 2011.
- 658 [8] M. E. Ritchie, B. Phipson, D. Wu, Y. Hu, C. W. Law, W. Shi, and G. K. Smyth. limma  
659 powers differential expression analyses for RNA-sequencing and microarray studies. *Nu-  
660 cleic Acids Research*, pages gkv007–, 2015.
- 661 [9] Belinda Phipson and Gordon K Smyth. Permutation p-values should never be zero: cal-  
662 culating exact p-values when permutations are randomly drawn. *Statistical applications  
663 in genetics and molecular biology*, 9(1), 2010.

- 664 [10] Thomas H Cormen, Charles E Leiserson, Ronald L Rivest, and Clifford Stein. *Intro-*  
665 *duction to Algorithms, Second Edition*, volume 7. 2001.

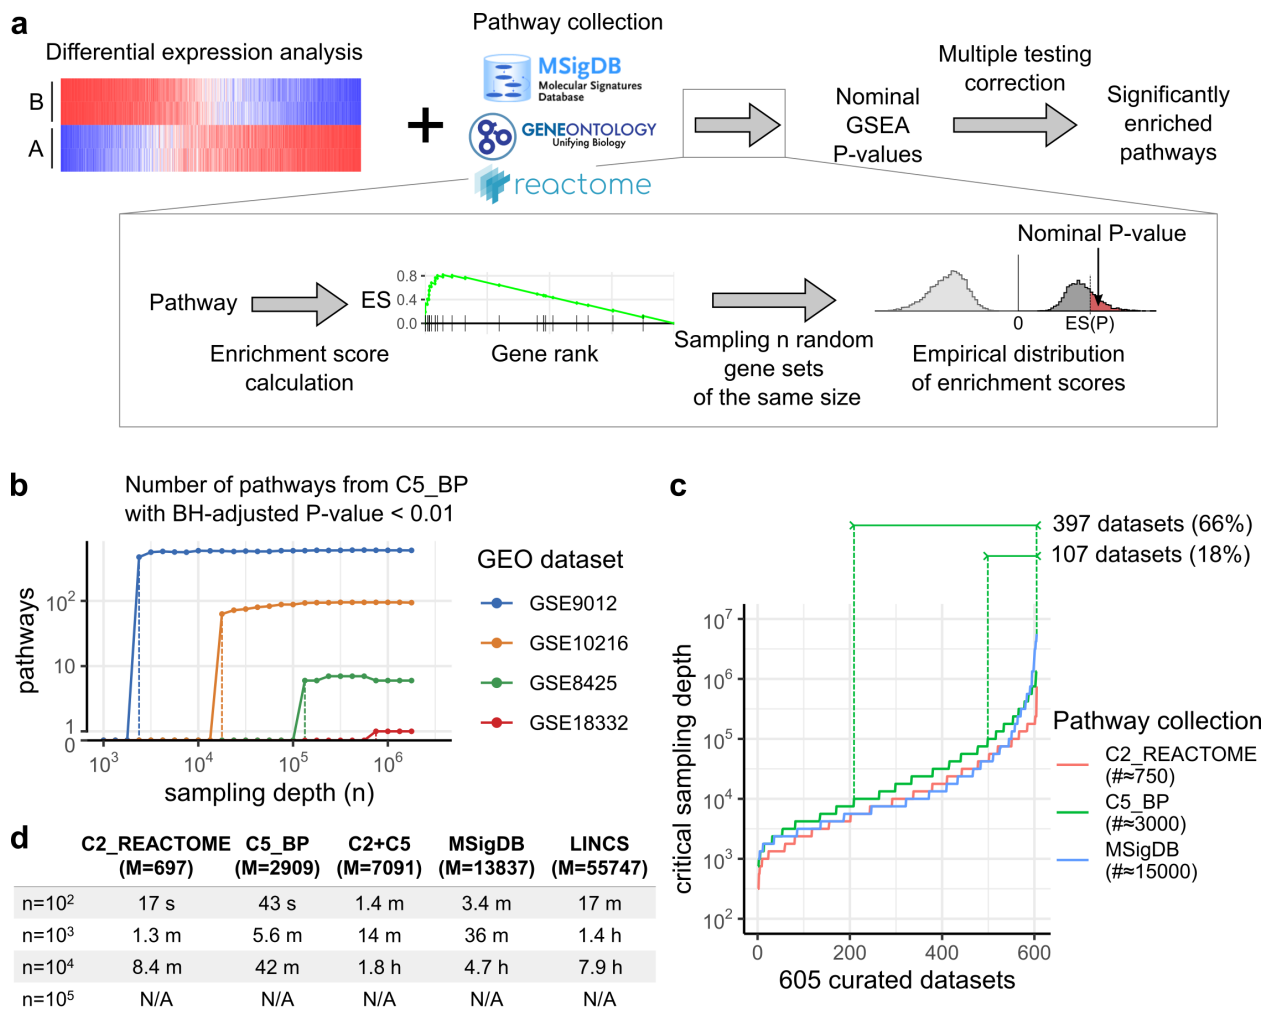

Figure 1: Gene Set Enrichment Analysis (GSEA) sensitivity depends on the ability to reach high sampling depth. **a**, Overview of preranked GSEA method. **b**, The number of pathways reaching Benjamini-Hochberg adjusted P-value threshold depends on the sampling depth in a phase transition manner. The critical sampling depth, where the transition happens, varies with the dataset. **c**, Distribution of critical sampling depth values across 605 curated datasets from Gene Expression Omnibus, as estimated for three pathway collections. **d**, Time required for the reference GSEA implementation to estimate P-values for different gene set collections and sampling depth values for dataset GSE22293. N/A values indicate out of memory errors.

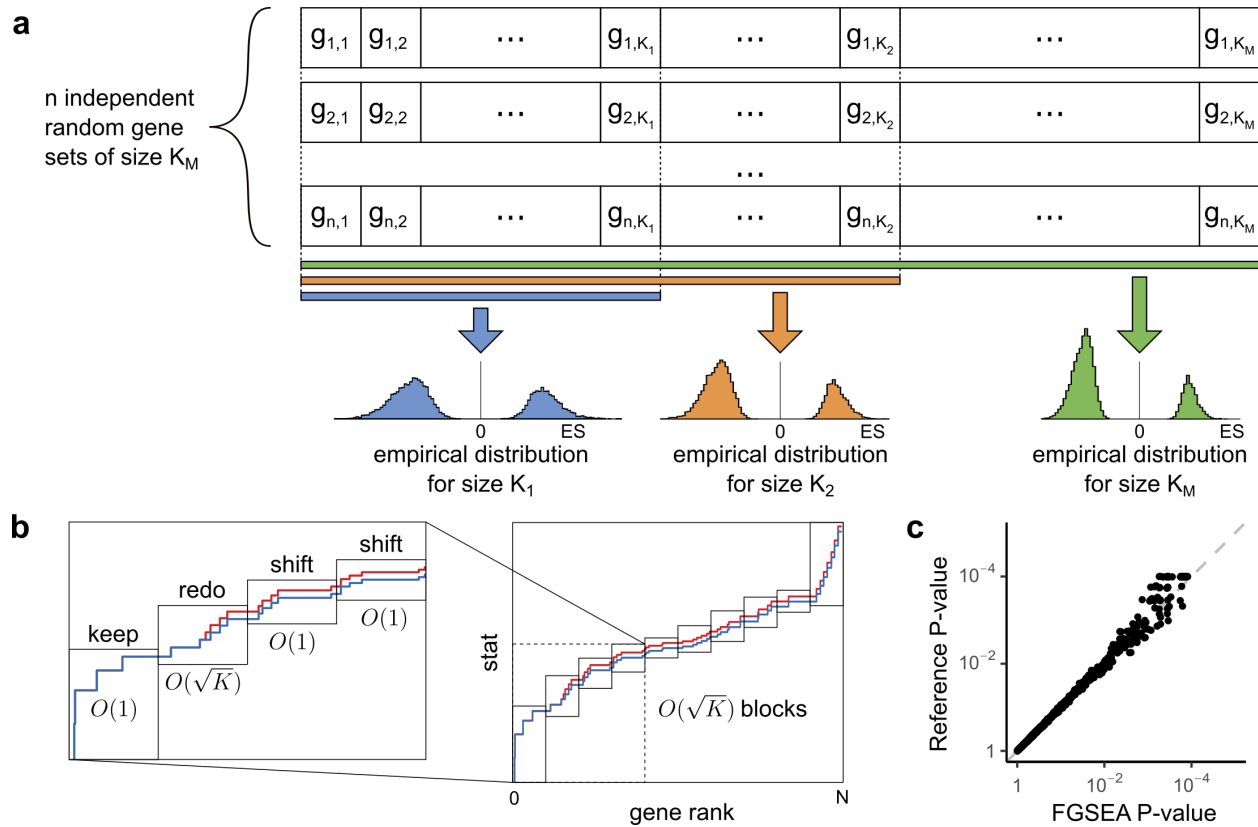

Figure 2: Preranked gene set enrichment analysis can be sped up by sharing sampling information between different gene set sizes. **a**, It is sufficient to generate  $n$  independent samples of size  $K_M$  to calculate empirical distribution for any sizes  $K_j \leq K_M$  by considering only the prefix of the samples of the size  $K_j$ . **b**, For a given gene sample enrichment scores for all the prefixes can be efficiently calculated by employing a square root heuristic. **c**, The P-values calculated with the FGSEA-simple method are consistent with the reference implementation, but the results are obtained hundreds times faster.

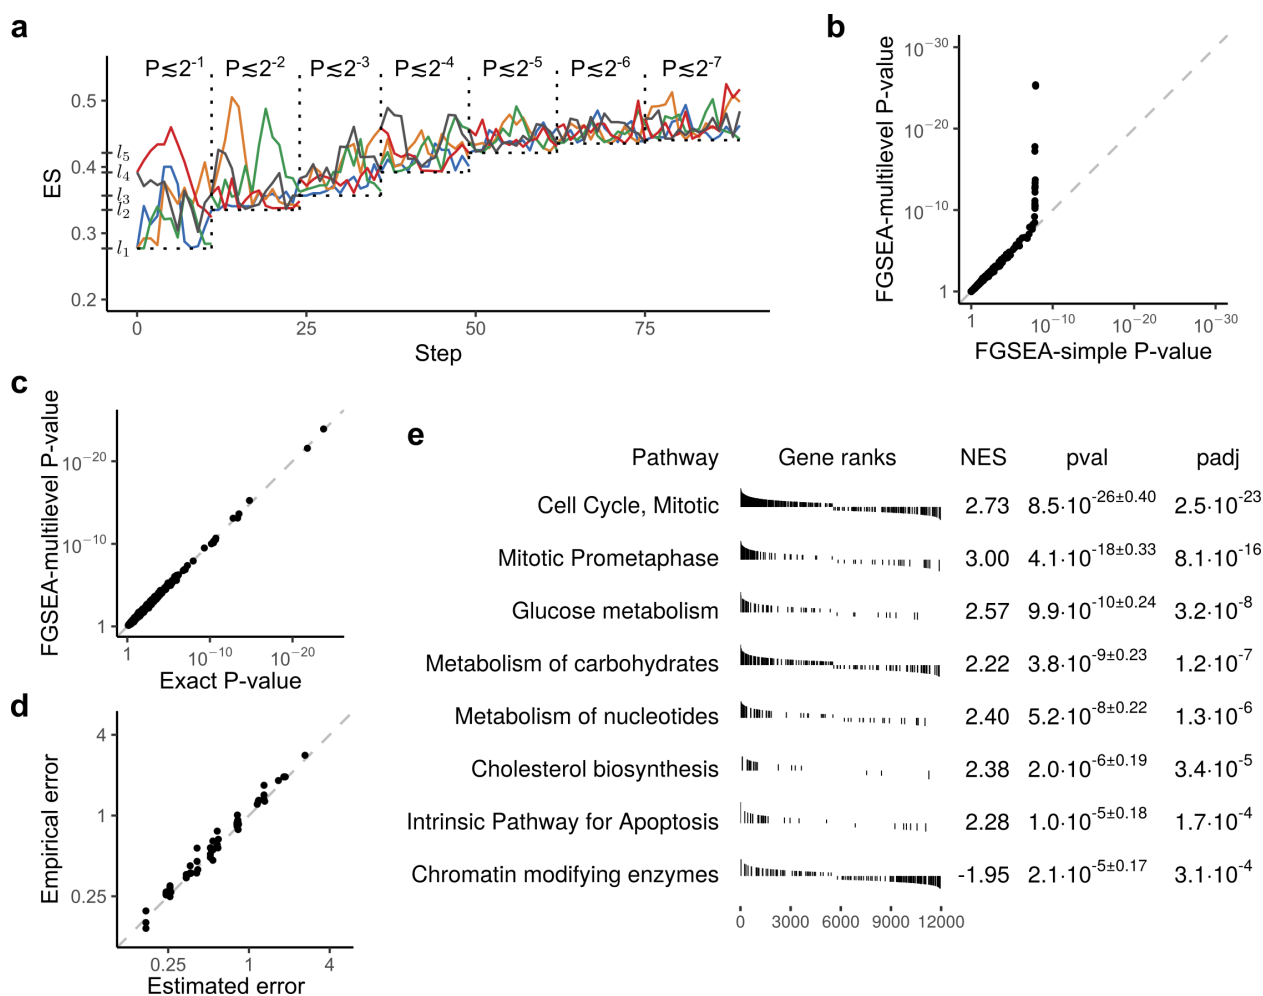

Figure 3: Adaptive multilevel Monte Carlo sampling scheme can be used to calculate arbitrarily low P-values. **a**, A toy illustration of the multilevel split Monte Carlo scheme for sample size of  $Z = 5$ . **b**, Comparison of GSEA P-values as calculated by FGSEA-simple method run with the sampling depth  $n = 10^8$  and FGSEA-multilevel with the sample size of  $Z=101$ . **c**, Comparison of P-values as calculated with an exact method and FGSEA-multilevel method. Both methods were run on gene-level statistic values rounded to integers. **d**, Comparison between estimated and an observed error of  $\log_2$  P-values for different P-values (from  $10^{-4}$  to  $10^{-100}$ ), gene set sizes (from 15 to 250) and sample sizes (from 101 to 1001). **d**, An example of FGSEA results as run with FGSEA-multilevel method for Th0 vs Th1 comparison and Reactome pathways. The analysis was run with sample size of  $Z = 101$ . Redundant pathways were filtered.

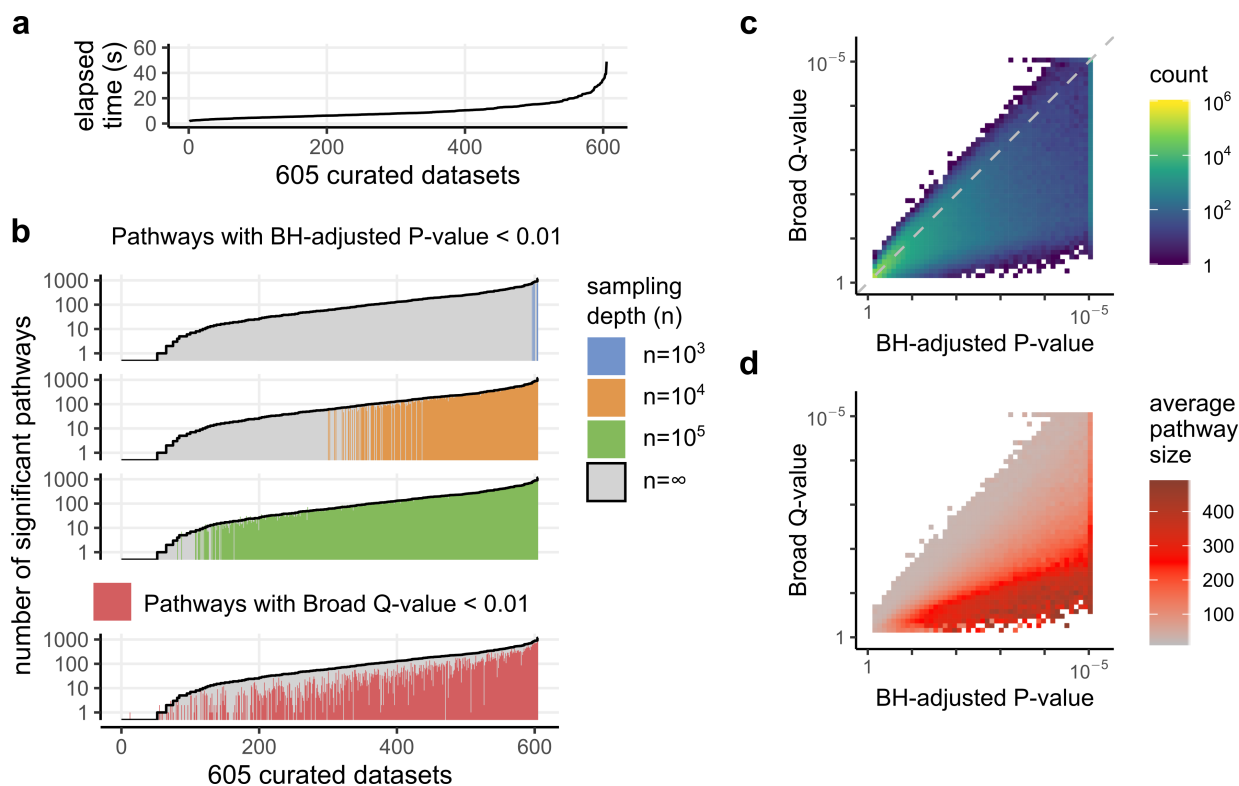

Figure 4: FGSEA method with the multilevel approach detects more statistically significant pathways compared to other GSEA implementations in a fraction of time. All plots represent data from analysis of the collection of 605 curated GEO datasets with C5\_BP used as a gene set collection. **a**, Wall clock time of running FGSEA. **b**, The number of detected statistically significant pathways for different adjusted P-value calculation procedures. Pathways with small BH-adjusted P-value after FGSEA-multilevel are shown in grey. Pathways with small BH-adjusted P-value after FGSEA-simple are shown in blue, orange and green, depending on the sampling depth. Pathways with small Q-values as reported by Broad GSEA are shown in red. **c**, Comparison of BH-adjusted P-values for FGSEA-multilevel and Q-values reported by Broad GSEA. For illustration purposes all values are capped at 10<sup>-5</sup>. **d**, Same as **c** but average pathway sizes are shown.

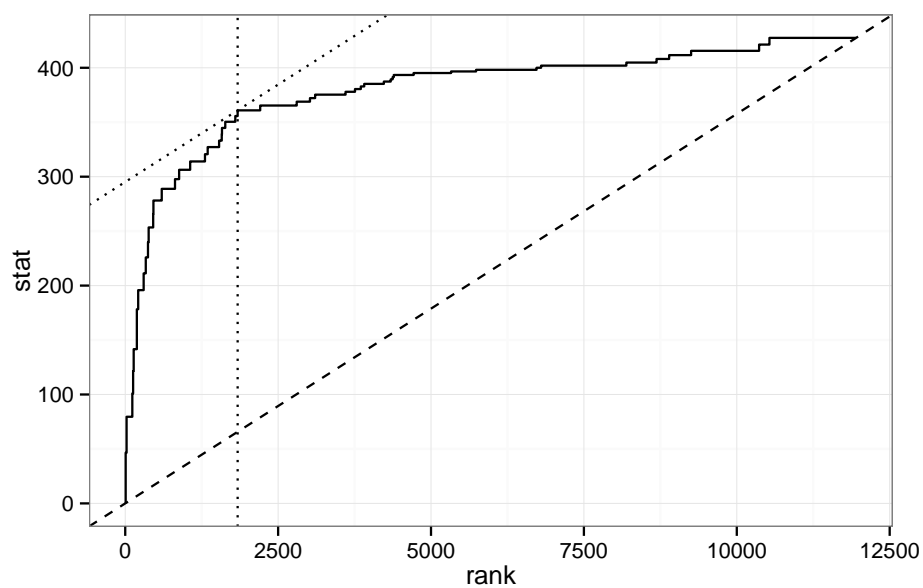

Figure S1: A graph that corresponds to a calculation of enrichment score. Each breakpoint on a graph corresponds to a gene present in the pathway. Dotted lines cross at a point which is the farthest up from a diagonal (dashed line). This point correspond to gene  $i^+$ , where the maximal value of  $ES_i$  is reached.

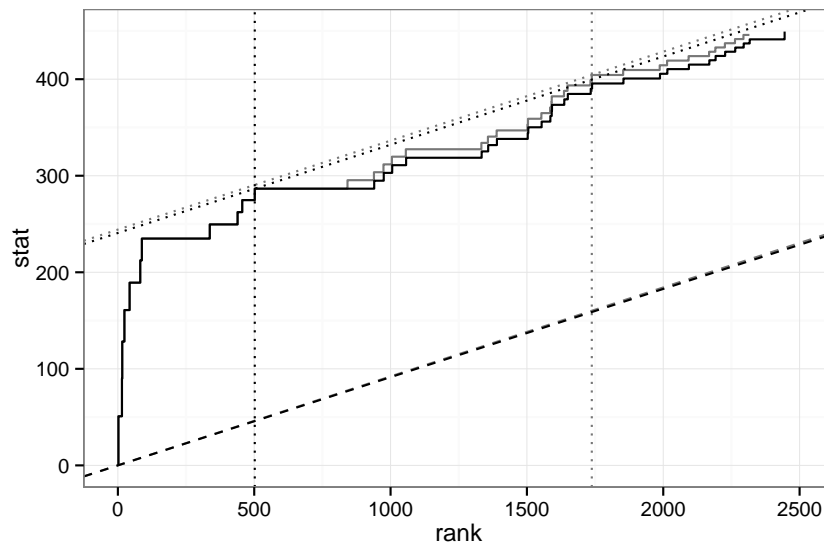

Figure S2: Update of an enrichment score graph when gene  $\pi_k \approx 800$  is added. Only a fragment is shown. Black graph corresponds to a graph for gene set  $\pi[1..k-1]$ , gray graph corresponds to  $\pi[1..k]$ . A part of the graph to the left of  $x = x_{r_k}$  does not change and the other part is shifted to the top-left corner. The diagonal  $((x_0, y_0), (x_N, y_N))$  is rotated counterclockwise.
